# Supplementary material
Source: Springer Nature journal article supplement (https://www.springermedizin.de/resource/supplementary/12958_2014_1309_MOESM4_ESM.pdf/9567000)

- Dominant follicles
- Non-dominant follicles

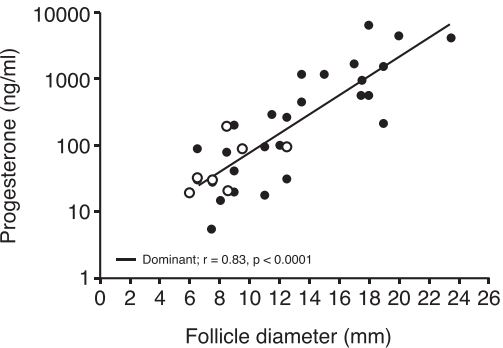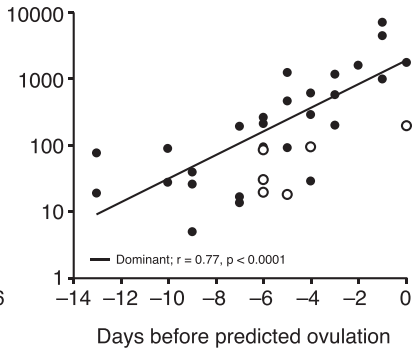

**G**

**H**

Supplement: MOESM4 [file 9567000]
